# Supplementary material for: Ten-year distant-recurrence risk prediction in breast cancer by CanAssist Breast (CAB) in Dutch sub-cohort of the randomized TEAM trial
Source: Springer Nature journal article supplement (doi:10.1186/s13058-023-01643-2), 2023-04-14

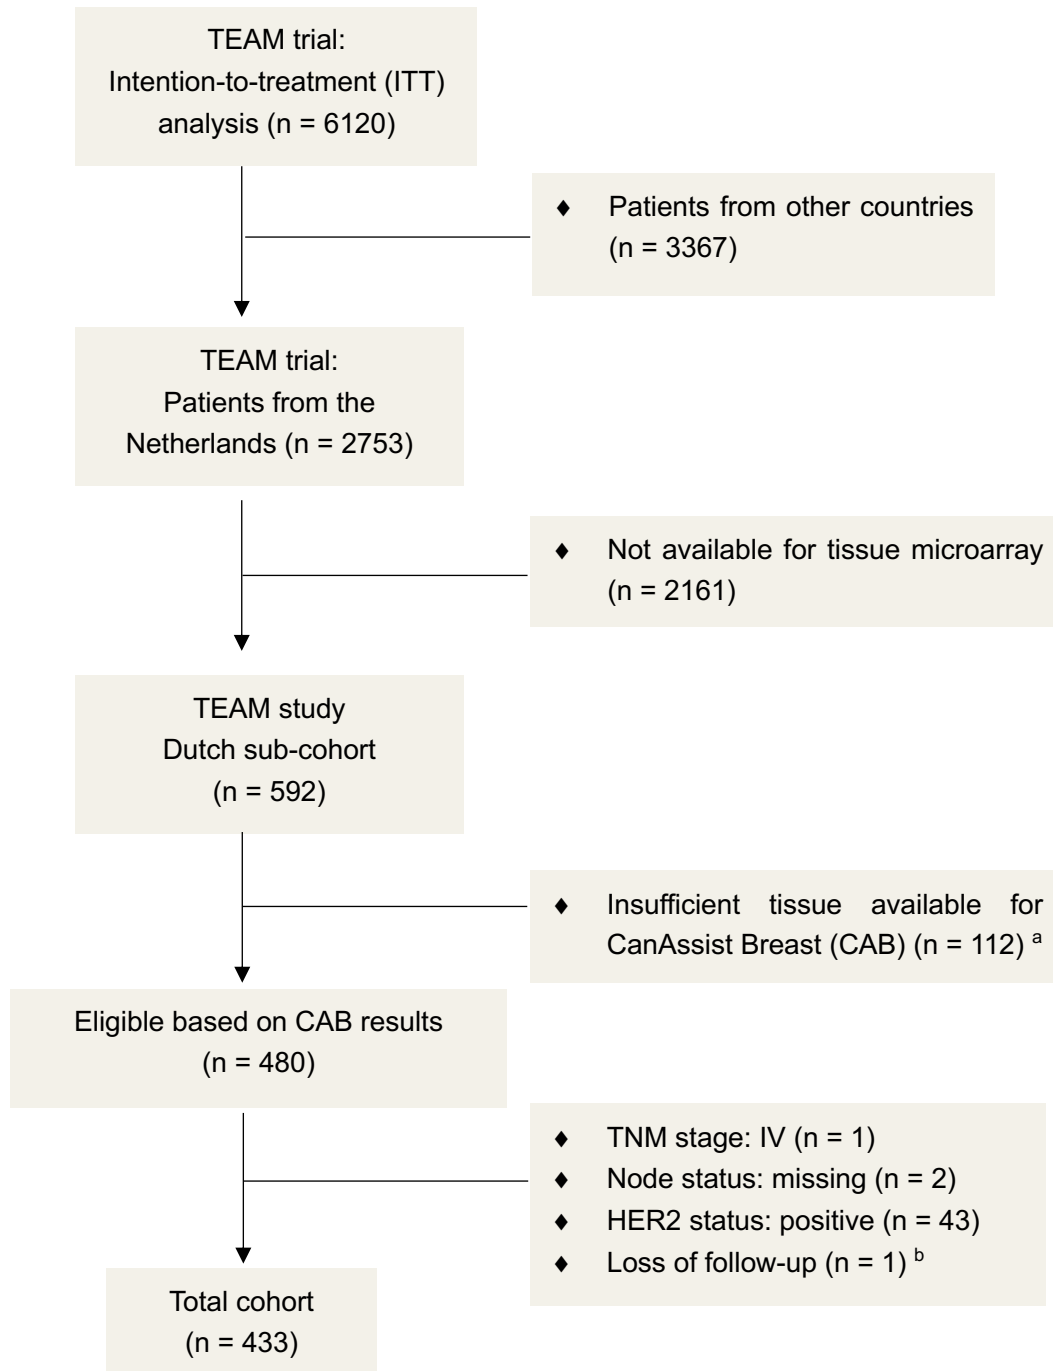

Supplement: MOESM1 [file 25244196]
